# Supplementary material for: Probing the influence of crosslinkers on the properties, response, and degradation of enzymatic hydrogels for electrochemical glucose biosensing through fluorescence analysis
Source: Royal Society of Chemistry journal article supplement (doi:10.1039/d4ra00265b), 2024-01-01
Supplement: d4ra00265b1.pdf [file d4ra00265b1.pdf]

## Electronic Supplementary Information for “Probing the influence of crosslinkers on the properties, response, and degradation of enzymatic hydrogels for electrochemical glucose biosensing through fluorescence analysis”

Jancarlo Diaz-Gonzalez, L. G. Arriaga, and Jannu R. Casanova-Moreno\*

Centro de Investigación y Desarrollo Tecnológico en Electroquímica, Pedro Escobedo, 76703, Querétaro, Mexico.

\*Correspondence: jcasanova@cideteq.mx

### 1. Hydrogel profilometries

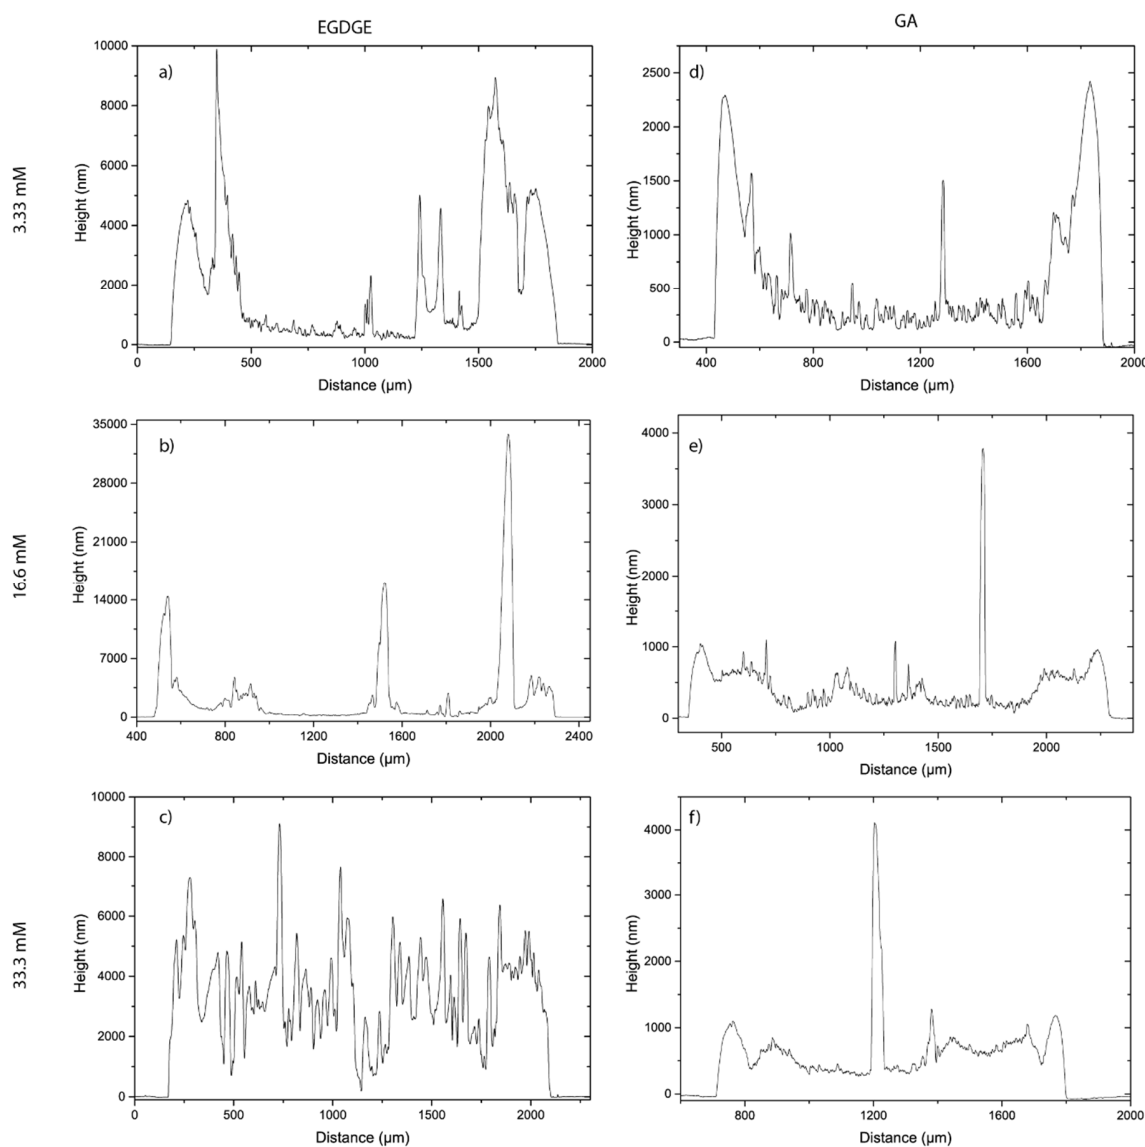

**Figure S1.** Profilometries of (a-c) GA-based and (d-f) EGDGE-based GOx/BPEI hydrogels prepared using cross-linkers at (a,d) 3.33 mM, (b,e) 16.6 mM and (c,f) 33.3 mM deposited on glass surfaces.

## 2. Hydration of the hydrogel

The video file titled "Video\_S1" presents the sequence of fluorescence images of a hydrogel deposited on glass prepared with 33.3 mM glutaraldehyde (GA) upon the addition of a drop of phosphate buffer (PB) 0.1 M pH = 7.4. The video is displayed at half of the actual speed. The appearance of the folds and change in the deposit footprint can be clearly observed.

## 3. Stability of the deposited hydrogels

**Table S1.** Stability evaluation (adhesion failure) for 30 days in 0.1 M PB pH 7.4 on glass and gold surfaces of crosslinked hydrogels with different concentrations of GA and EGDGE.

| Gel                                  | Adherence failure at 15 days |       | Adherence failure at 30 days |       |
|--------------------------------------|------------------------------|-------|------------------------------|-------|
|                                      | Gold                         | Glass | Gold                         | Glass |
| BPEI/GO <sub>x</sub> /GA 3.33 mM     | 0/5                          | 3/5   | 0/5                          | 3/5   |
| BPEI/GO <sub>x</sub> /GA 16.65 mM    | 0/5                          | 1/5   | 0/5                          | 1/5   |
| BPEI/GO <sub>x</sub> /GA 33.3 mM     | 0/5                          | 0/5   | 0/5                          | 0/5   |
| BPEI/GO <sub>x</sub> /EGDGE 3.33 mM  | 1/5                          | 3/5   | 1/5                          | 3/5   |
| BPEI/GO <sub>x</sub> /EGDGE 16.65 mM | 1/5                          | 4/5   | 1/5                          | 4/5   |
| BPEI/GO <sub>x</sub> /EGDGE 33.3 mM  | 2/5                          | 4/5   | 2/5                          | 4/5   |

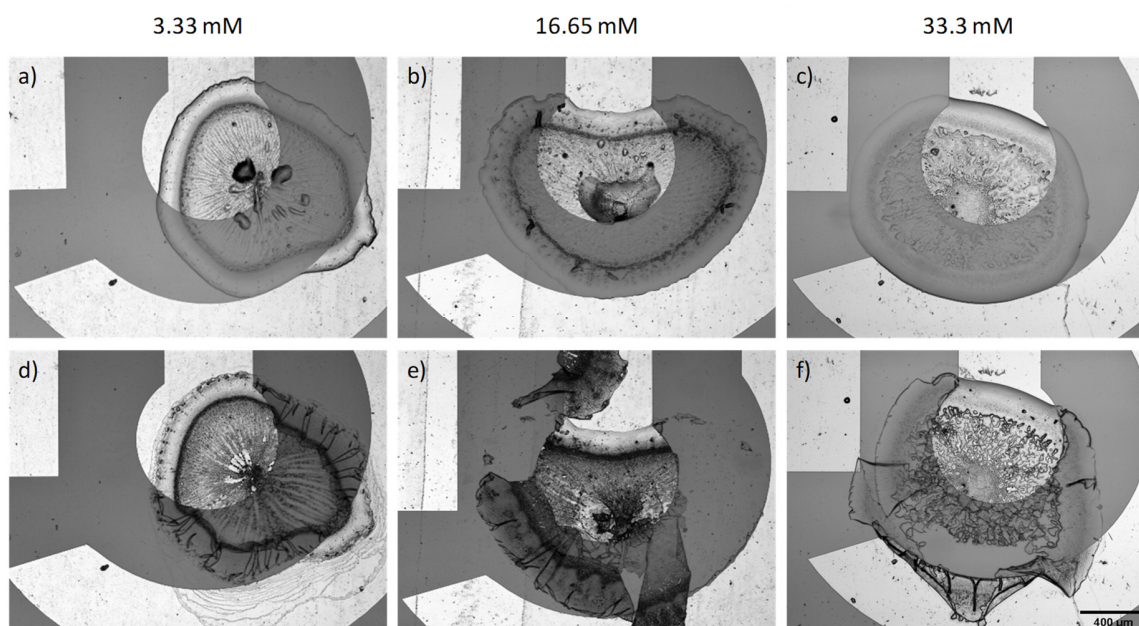

**Figure S2.** Structural damage after the swelling process due to the swelling degree/water absorption related to the EGDGE concentration. Dehydrated (a-c) and hydrated (d-f) state of the gels.

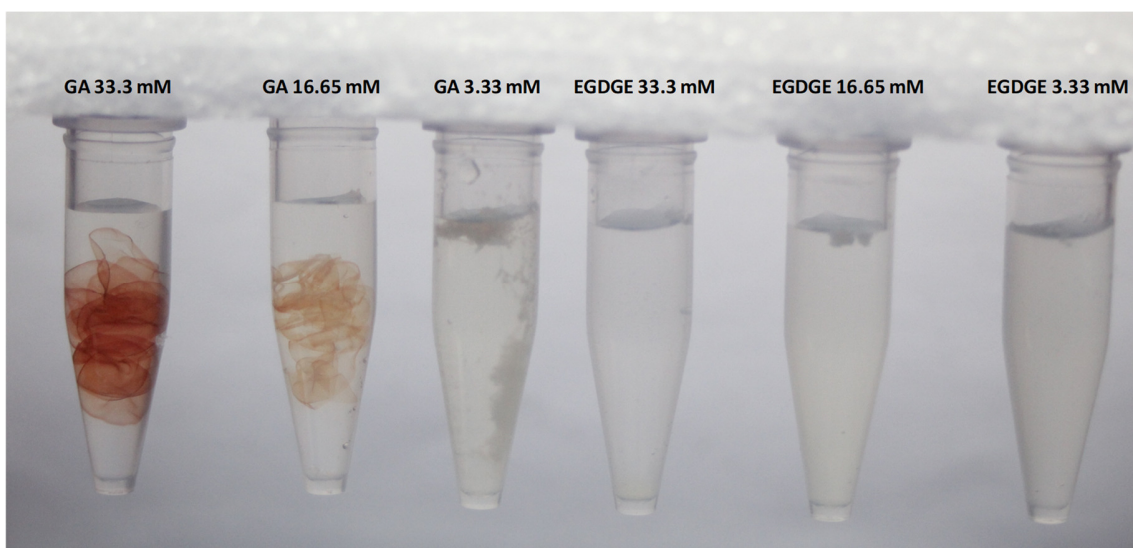

**Figure S3.** Physical appearance of unsupported EGDGE and GA crosslinked gels immersed in 0.1 M PB pH 7.4 for 1 h.

#### 4. Enzyme kinetic parameters

**Table S2.** Maximum current densities ( $J_{max}$ ) and apparent Michaelis-Menten constants ( $K_m^{app}$ ) determined for crosslinked gels with different concentrations of EGDGE and GA.

| Gel                     | $J_{max}$<br>( $\mu\text{A cm}^2$ ) | $K_m^{app}$<br>(mM) |
|-------------------------|-------------------------------------|---------------------|
| BPEI/GOx/GA 3.33 mM     | 56.07±2.45                          | 1.62±0.22           |
| BPEI/GOx/GA 16.65 mM    | 77.18±2.11                          | 1.52±0.13           |
| BPEI/GOx/GA 33.3 mM     | 66.39±4.25                          | 1.95±0.36           |
| BPEI/GOx/EGDGE 3.33 mM  | 27.06±4.62                          | 13.43±3.51          |
| BPEI/GOx/EGDGE 16.65 mM | 26.12±2.64                          | 4.43±0.99           |
| BPEI/GOx/EGDGE 33.3 mM  | 43.70±1.75                          | 1.61±0.20           |

## 5. Spectroscopic studies

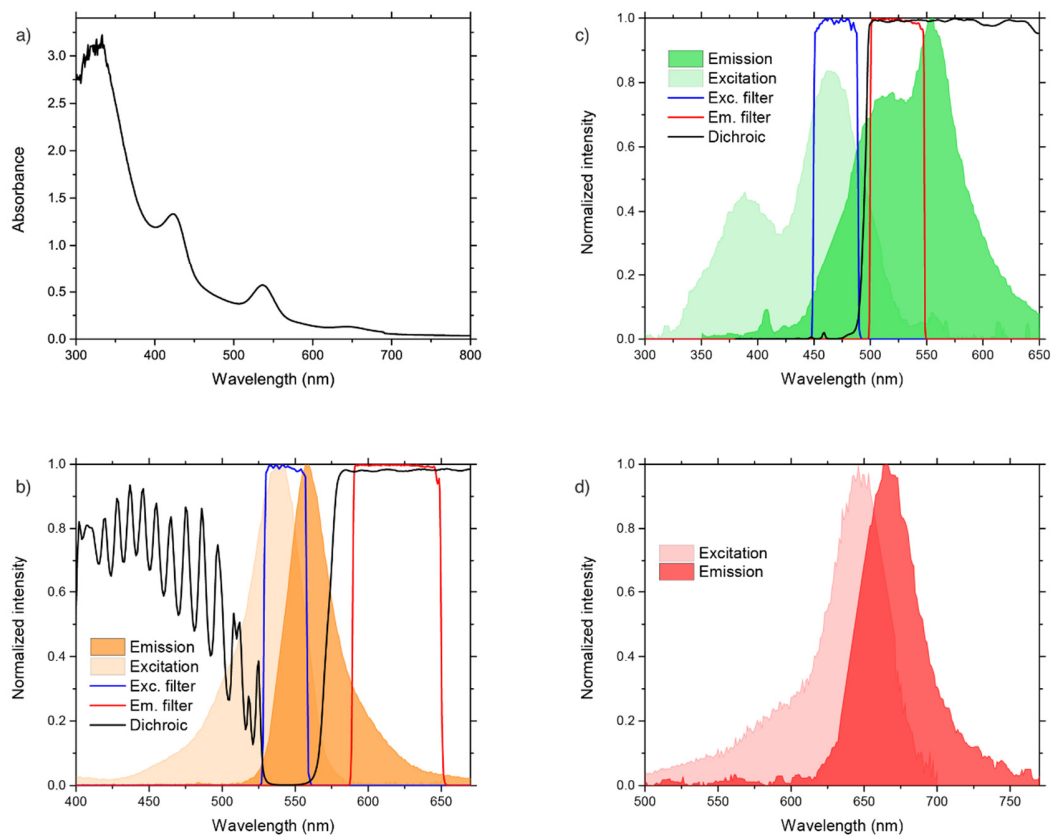

**Figure S4.** Spectroscopic characterization of GA-based hydrogels. a) UV-vis absorption spectrum. b-d) Excitation and emission spectra in three different wavelength regions. In (b) and (c), the normalized transmission spectra of the blue and green fluorescence filter sets are included.
